# Supplementary material for: Uncovering Social States in Healthy and Clinical Populations Using Digital Phenotyping and Hidden Markov Models: Observational Study
Source: bioRxiv or medRxiv preprint supplement (doi:10.1101/2024.06.07.24308598), 2025-03-27
Supplement: Supplementary file [file media-1.pdf]

## Supplementary materials

### Supplementary tables

Table S1: Demographics of healthy controls with training/validation split.

| Set        | Number | Age (Mean $\pm$ std) | Gender        | Dataset             | Country         | Education years (Mean $\pm$ std) |
|------------|--------|----------------------|---------------|---------------------|-----------------|----------------------------------|
| Training   | 91     | 60 $\pm$ 14          | F=47;<br>M=44 | PRISM=16;<br>HO=75  | NL=83;<br>ES=8  | 7 $\pm$ 5                        |
| Validation | 156    | 58 $\pm$ 12          | F=93;<br>M=63 | PRISM=12;<br>HO=144 | NL=151;<br>ES=5 | 6 $\pm$ 3                        |

\*std: standard deviation; F: female, M: male; NL: the Netherlands, ES: Spain.

Table S2: Results from linear regression models predicting Loneliness score from dwell time.

| Group                               | Predictor  | Estimate | Standard error | t value | p-value |
|-------------------------------------|------------|----------|----------------|---------|---------|
| All validation (n=49)               | Dwell time | -0.0006  | 0.0023         | -0.2782 | 0.7821  |
|                                     | Age        | -0.0047  | 0.0029         | -1.6400 | 0.1078  |
| Healthy control (validation) (n=12) | Dwell time | -0.0013  | 0.0015         | -0.8399 | 0.4227  |
|                                     | Age        | 0.0063   | 0.0021         | 3.0350  | 0.0141  |
| Schizophrenia (n=18)                | Dwell time | -0.0023  | 0.0050         | -0.4706 | 0.6447  |
|                                     | Age        | -0.0051  | 0.0152         | -0.3366 | 0.7411  |
| Alzheimer's disease (n=19)          | Dwell time | 0.0033   | 0.0029         | 1.1651  | 0.2611  |
|                                     | Age        | 0.0076   | 0.0048         | 1.5824  | 0.1331  |

Table S3: Binomial logistic regression age sensitivity analysis results; age cut-offs for healthy controls (HC) matched to each diagnostic group: HC vs SZ, AGE < 42; HC vs AD, AGE > 50; HC vs SCC, AGE > 43.

| Group                                   | Coefficient | Standard error | Odds   | z value | p-value | FDR corrected p-value |
|-----------------------------------------|-------------|----------------|--------|---------|---------|-----------------------|
| Schizophrenia                           | -0.0034     | 0.0184         | 0.9966 | -0.1858 | 0.8526  | 1.0000                |
| Alzheimer's disease                     | -0.0576     | 0.0148         | 0.9440 | -3.8989 | 0.0001  | 0.0003*               |
| Healthy/subjective cognitive complaints | -0.0165     | 0.0082         | 0.9837 | -2.0152 | 0.0439  | 0.1316                |

Table S4: Age-related results from linear regression models predicting MMSE score.

| Group                        | Estimate | Standard error | t value | p-value | FDR corrected p-value |
|------------------------------|----------|----------------|---------|---------|-----------------------|
| All validation               | -0.0416  | 0.0296         | -1.4059 | 0.1708  | 0.5123                |
| Healthy control (validation) | -0.0098  | 0.0144         | -0.6826 | 0.5120  | 1.0000                |
| Alzheimer's disease          | 0.0439   | 0.0569         | 0.7708  | 0.4521  | 1.0000                |

Table S5:1 Results from linear regression models predicting PANSS (sub)scores in participants with schizophrenia (n=18) (PANSS\_PT: Positive Scale, PANSS\_NT: Negative Scale, PANSS\_GT: General Psychopathology Scale, PANSS\_CS: Composite Scale).

| Response    | Predictor  | Estimate | Standard error | t value | p-value |
|-------------|------------|----------|----------------|---------|---------|
| PANSS_PT    | Dwell time | -0.0264  | 0.0491         | -0.5368 | 0.5993  |
|             | Age        | -0.0099  | 0.1499         | -0.0658 | 0.9484  |
| PANSS_NT    | Dwell time | 0.0043   | 0.0907         | 0.0472  | 0.9630  |
|             | Age        | -0.0852  | 0.2770         | -0.3077 | 0.7625  |
| PANSS_GT    | Dwell time | 0.0653   | 0.0866         | 0.7542  | 0.4624  |
|             | Age        | 0.2041   | 0.2643         | 0.7722  | 0.4520  |
| PANSS_CS    | Dwell time | -0.0306  | 0.0736         | -0.4166 | 0.6829  |
|             | Age        | 0.0754   | 0.2246         | 0.3357  | 0.7417  |
| PANSS_TOTAL | Dwell time | 0.0432   | 0.1995         | 0.2166  | 0.8315  |
|             | Age        | 0.1090   | 0.6090         | 0.1789  | 0.8604  |

## Supplementary figures

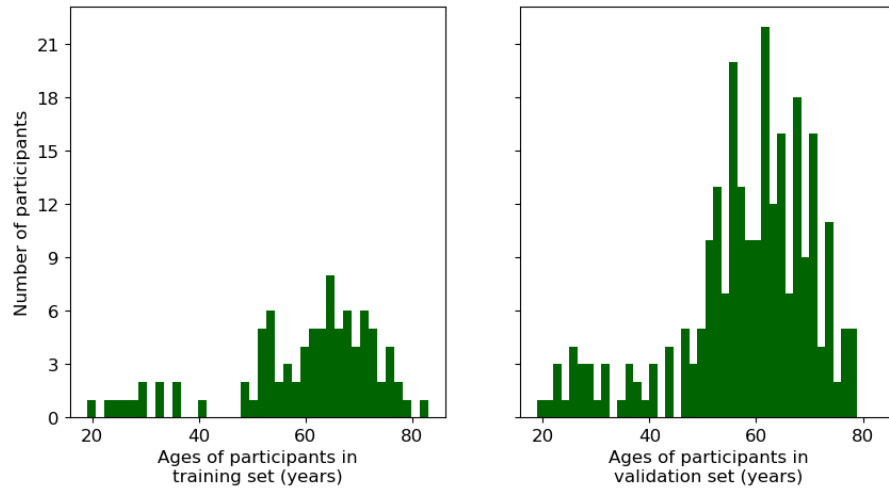

Figure S1: Age distributions of training participants and all validation participants.

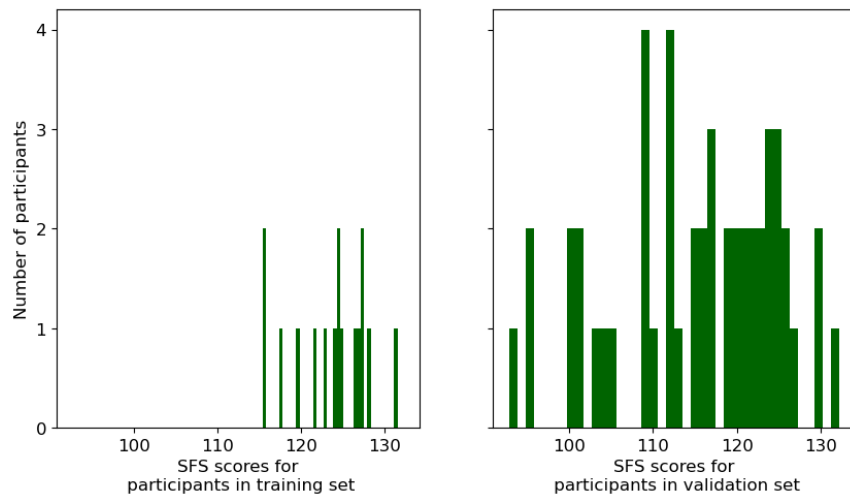

Figure S2: SFS scores of training participants and all validation participants (possible range: 55-135).

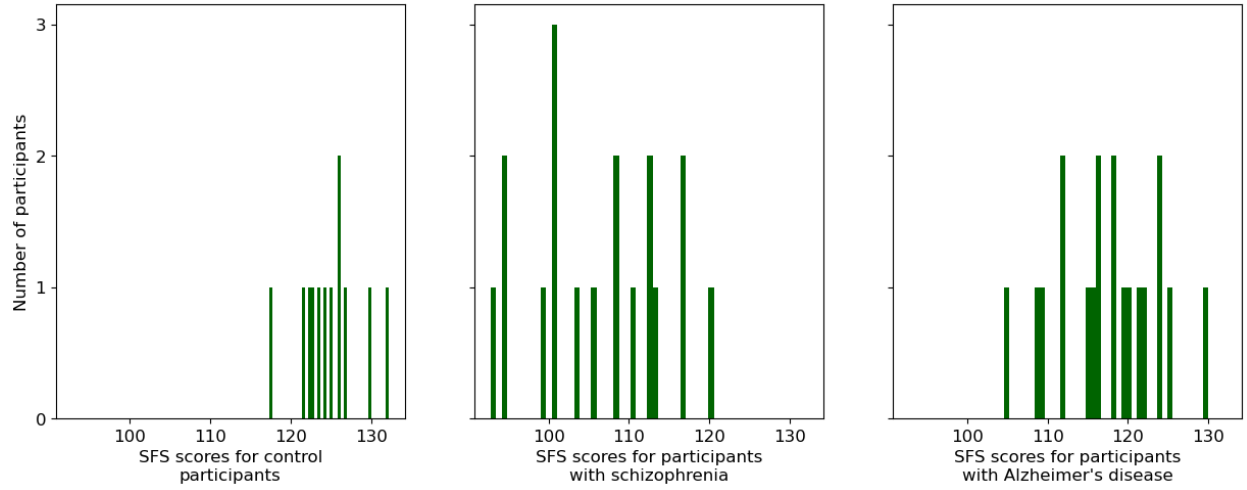

Figure S3: SFS scores of validation participants, split by diagnostic group.

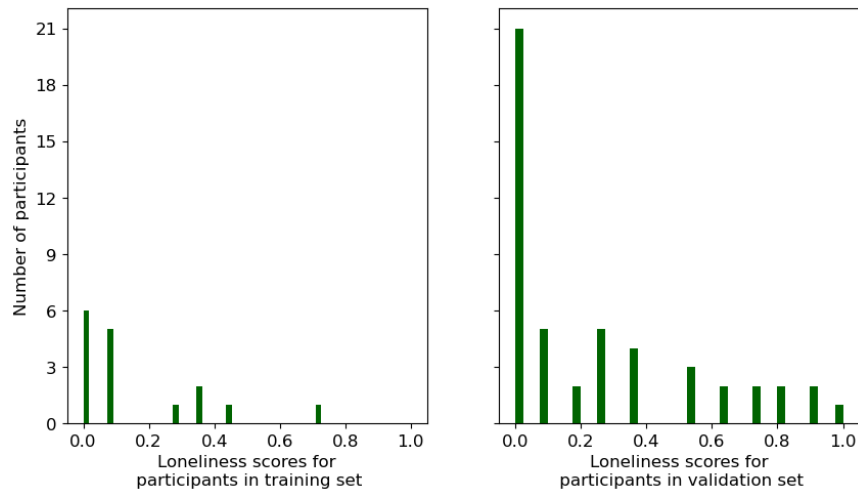

Figure S4: Loneliness scores of training participants and all validation participants (possible range: 0-11).

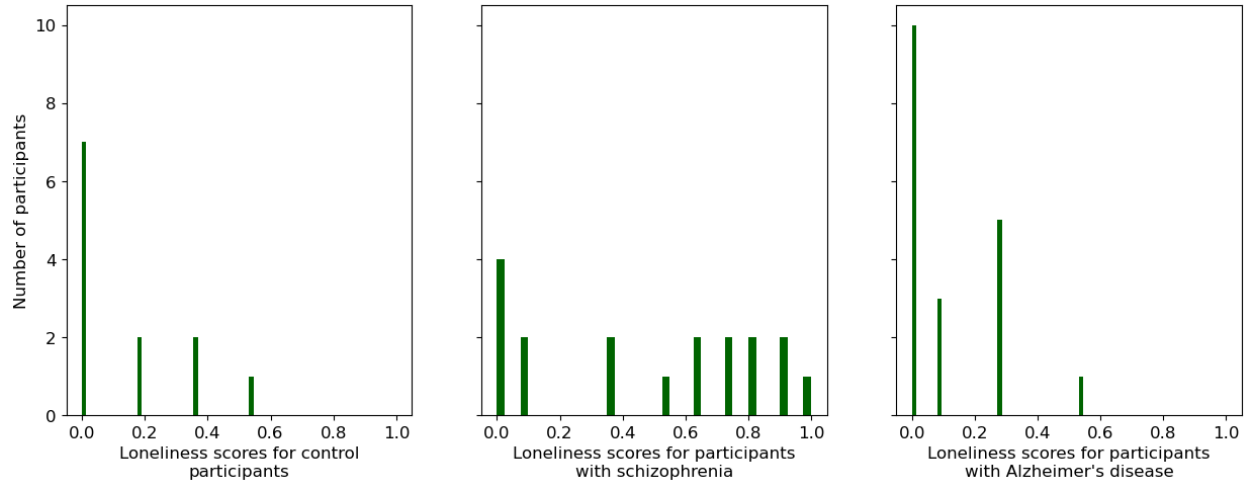

Figure S5: Loneliness scores of validation participants, split by diagnostic group.

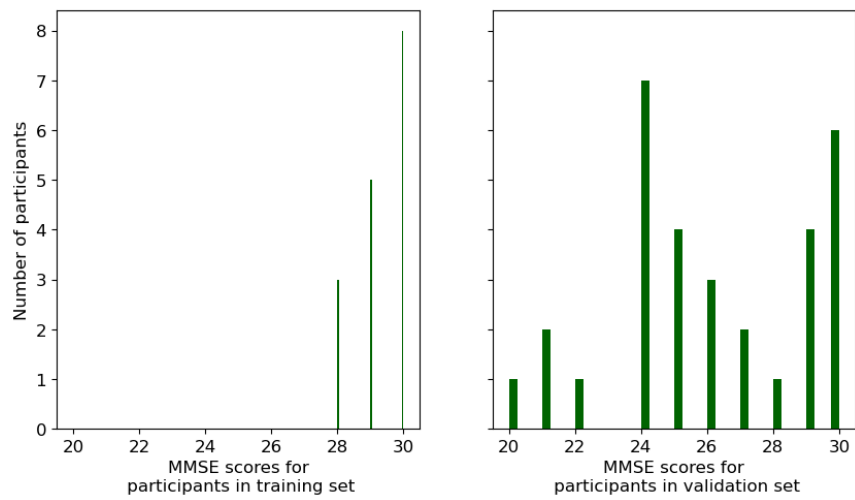

Figure S6: MMSE scores of training participants and all validation participants (maximum score = 30).

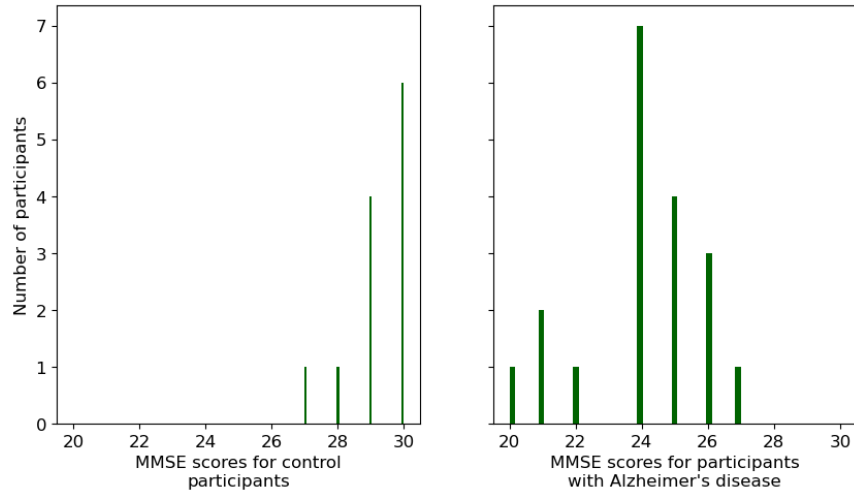

Figure S7: MMSE scores of validation participants, split by diagnostic group.

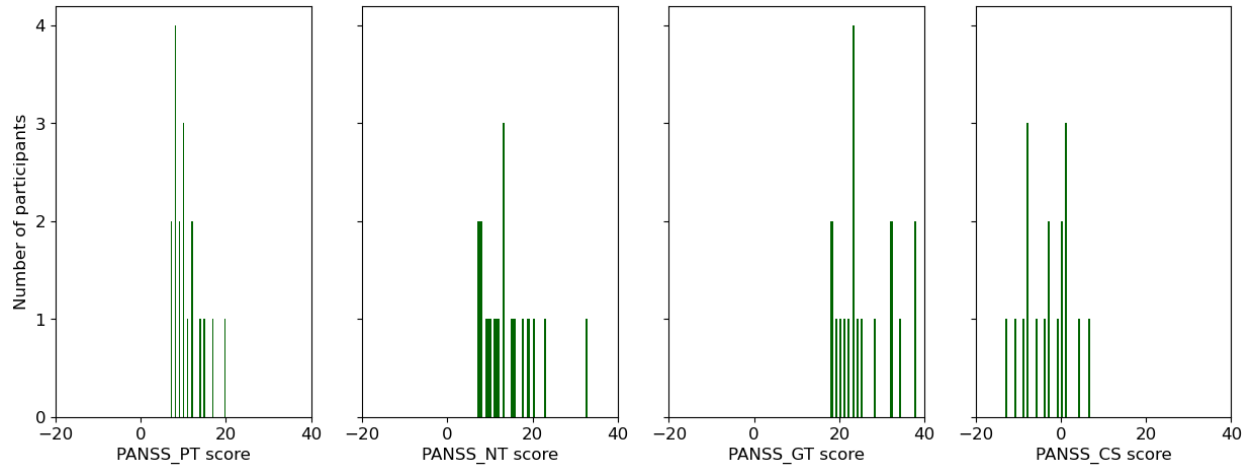

Figure S8: PANSS scores, split by (sub)scale. Positive (PT) and Negative (NT) Scales range: 7-49; General Psychopathology (GT) Scale range: 16-112; Total PANSS score: sum of the sub scales; Composite Scale (CS) range: -42 to +42 (subtract negative score from positive score).

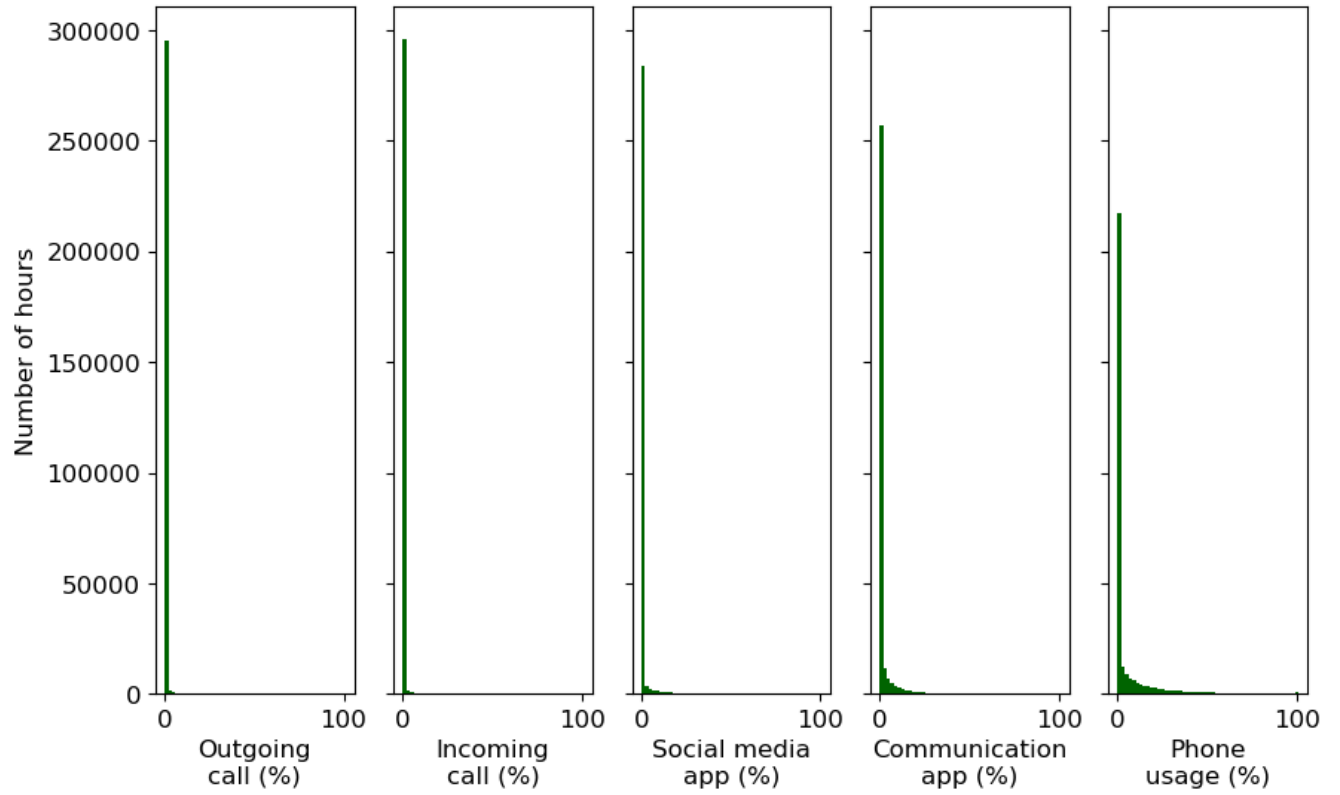

Figure S9: Distributions of hourly percentage values per channel for all time series; these distributions are very zero-inflated.

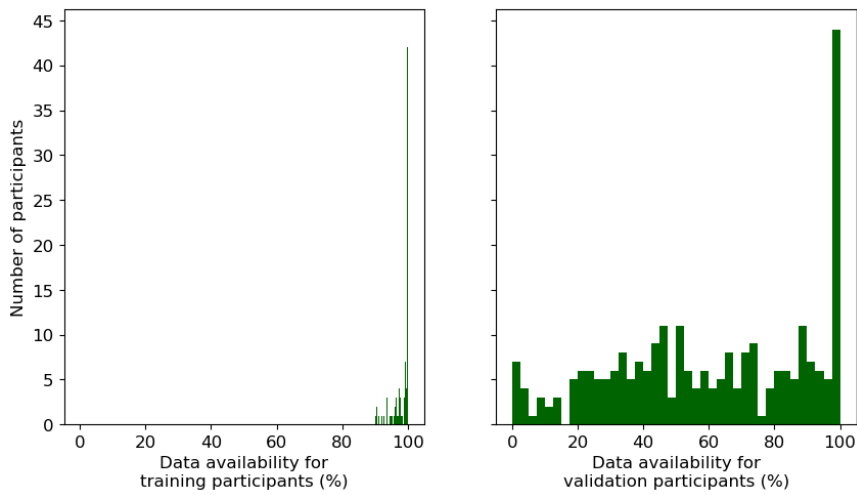

Figure S10: Percentage of overall data availability (indicating missingness) for training participants and all validation participants.

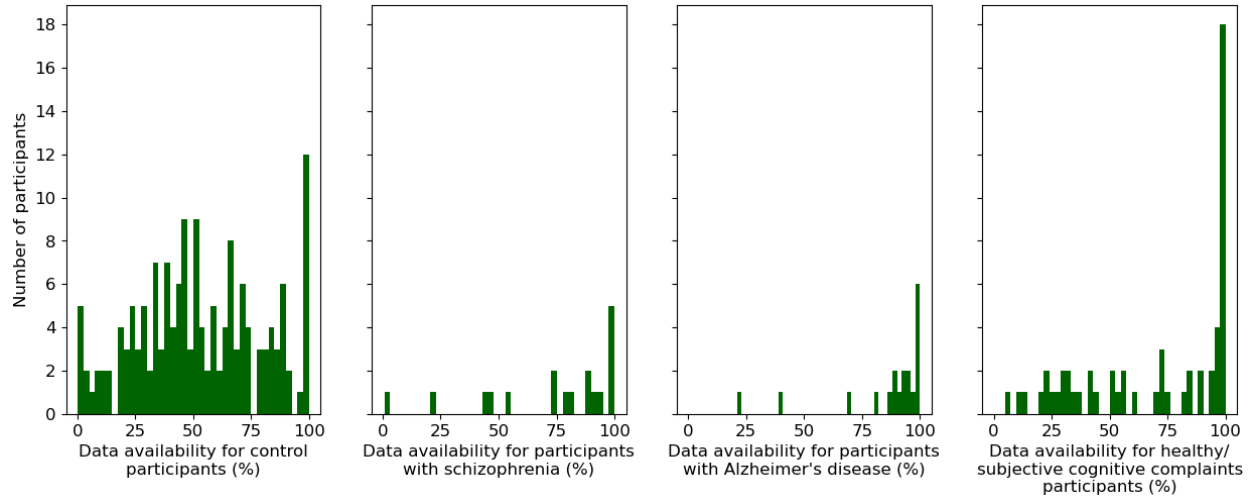

Figure S11: Percentage of overall data availability (indicating missingness) for validation participants, split by diagnostic group.

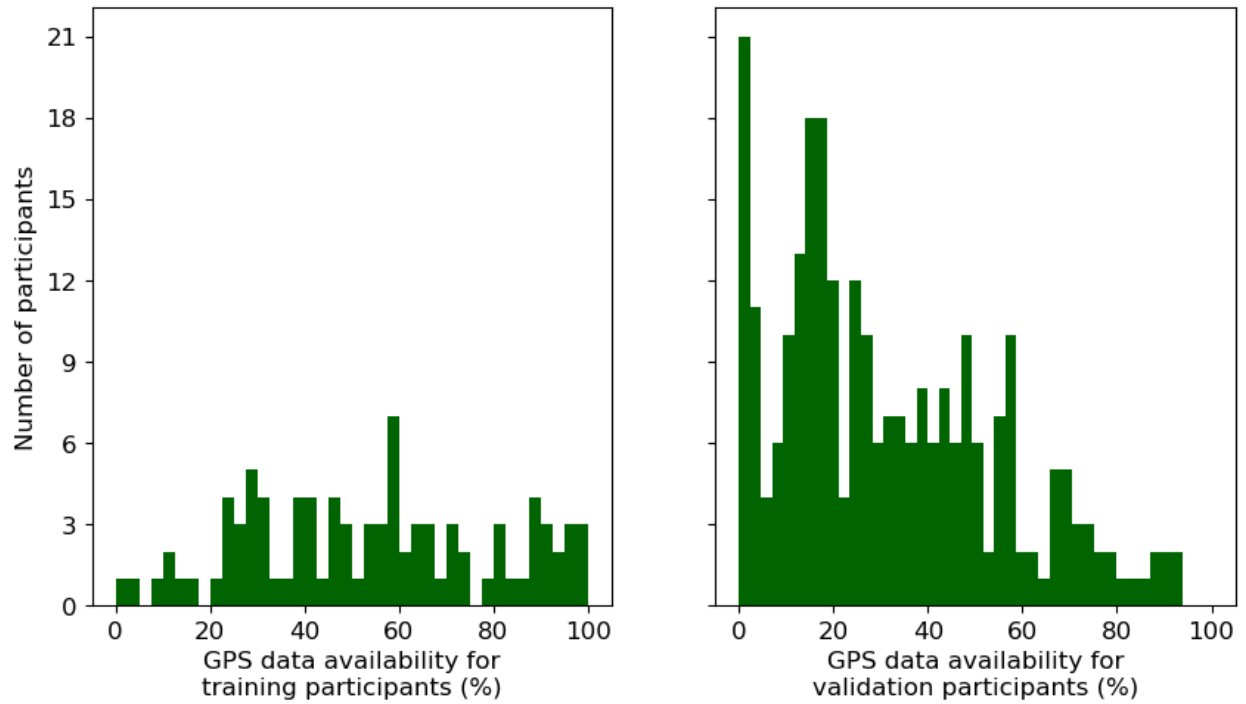

Figure S12: Percentage of GPS data availability (indicating missing GPS data) for training participants and all validation participants.



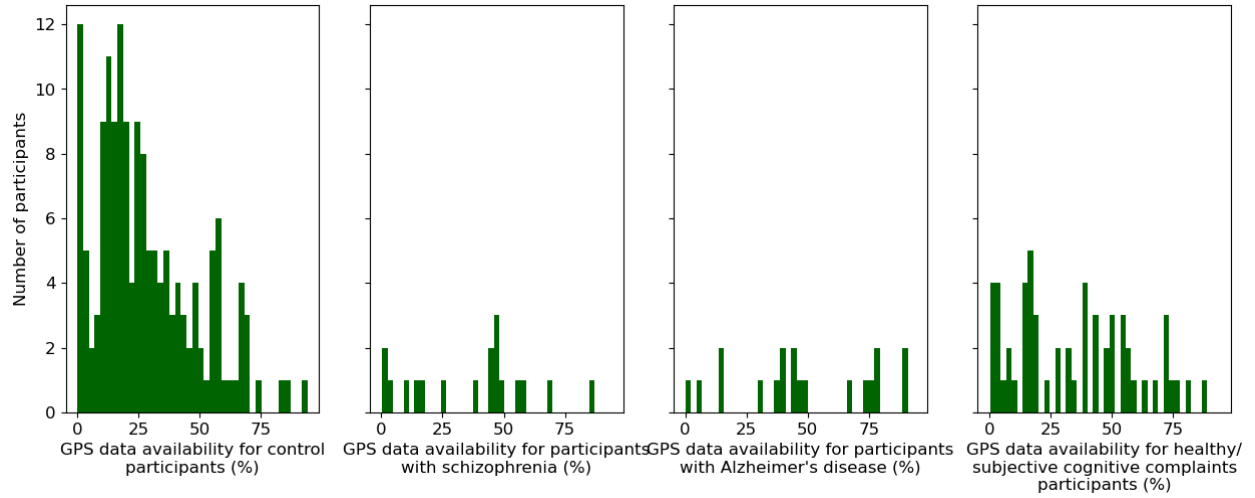

Figure S13: Percentage of GPS data availability (indicating missing GPS data) for validation participants, split by diagnostic group.

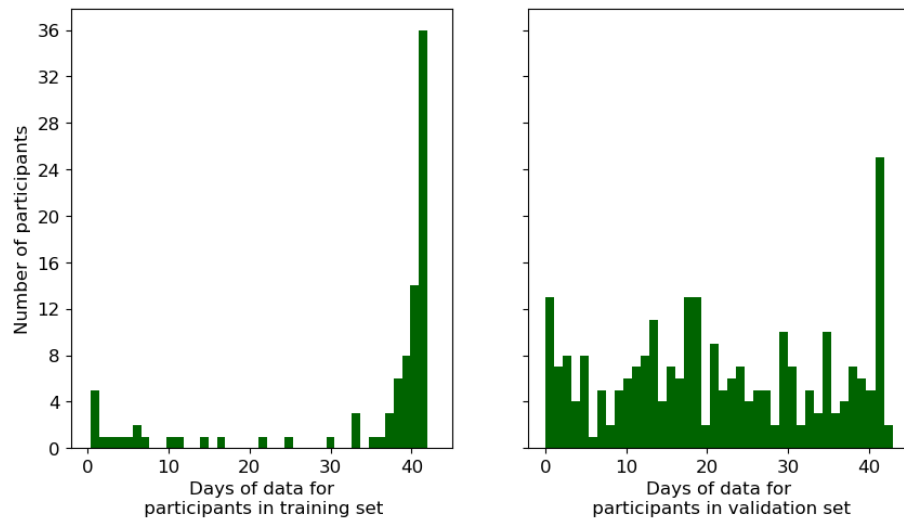

Figure S14: Days of data for training and validation participants (i.e. time series length).

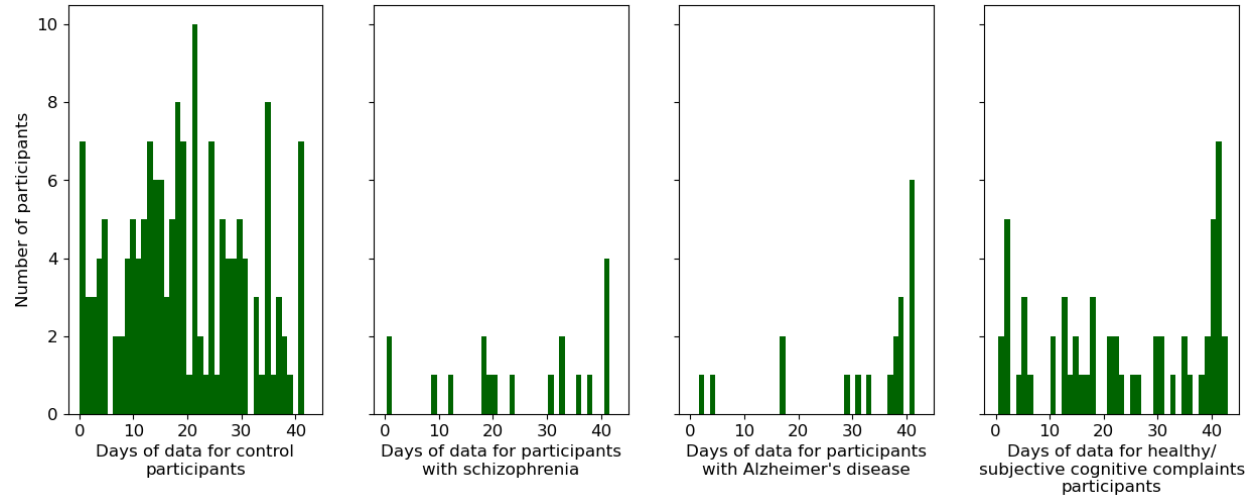

Figure S15: Days of data for validation participants (i.e. time series length).
